# Supplementary material for: Complex Presentation of Hao-Fountain Syndrome Solved by Exome Sequencing Highlighting Co-Occurring Genomic Variants
Source: MDPI journal article supplement (doi:10.3390/genes13050889), 2022-05-16
Supplement: s1 [file s1]

**Supplemental Table S1.** WES statistics and data output.

|                                                                        |                                      |
|------------------------------------------------------------------------|--------------------------------------|
| WES enrichment kit                                                     | SureSelect Human All Exon V7         |
| Sequencing platform                                                    | Illumina NovaSeq6000                 |
| Target regions coverage >10x                                           | 95%                                  |
| Target regions coverage >20x                                           | 94%                                  |
| Average depth on target                                                | 147x                                 |
| Total number of high-quality variants                                  | 72,910                               |
| Variants with effect on CDS or affecting splice sites <sup>1</sup>     | 13,847                               |
| Private, clinically associated and low frequency variants <sup>2</sup> | 242                                  |
| Putative disease associated genes <sup>3</sup>                         | 12 <sup>4</sup>                      |
| Disease genes with pathogenic variants                                 | <i>USP7, PKD2, CFTR</i> <sup>5</sup> |

<sup>1</sup> High-quality non-synonymous SNV plus indels within coding exons and splice regions (-3/+8 nt).

<sup>2</sup> High-quality, rare/private, functionally relevant variants (gnomAD MAF <0.1%; in house database MAF <1%).

<sup>3</sup> High-quality, rare/private, functionally relevant variants with CADD phred>20.0, M-CAP>0.025, either autosomal dominant or recessive disease associated genes.

<sup>4</sup> *ABCC11* (c.1369delC, p.Gln457fs), *CLCN6* (c.668G>A, p.Arg223Gln), *FLNB* (c.731C>T, p.Pro244Leu), *IMPG2* (c.2716C>T, p.Arg906\*), *KCNQ3* (c.1918G>A, p.Val640Met), *MLH3* (c.278G>A, p.Arg93Gln), *PKD2* (c.295G>T, p.Glu99\*), *SETD1B* (c.4859C>T, p.Pro1620Leu), *SIX5* (c.1288C>G, p.Pro430Ala), *SYNE1* (c.19919A>T, p.His6640Leu), *TMEM43* (c.203T>C, p.Leu68Pro), *USP7* (c.1639G>T, p.Glu547\*).

<sup>5</sup> The *CFTR* variants were detected by manual inspection of reads mapping (c.1521\_1523delCTT (Phe508Del, rs113993960, VCV000634837), c.1210-12T(5) [IVS8-5T, rs1805177, VCV000242535]).
